# Supplementary material
Source: PubMed Central journal article supplement (PMC6275623)
Supplement: 11658_2013_90_MOESM1_ESM.pdf [file 11658_2013_90_MOESM1_ESM.pdf]

Supplementary material

**PTPN4 NEGATIVELY REGULATES CRKI IN HUMAN CELL LINES**

JUAN ZHOU<sup>1</sup>, BINGBING WAN<sup>1,2</sup>, JINGXUAN SHAN<sup>1</sup>, HUILI SHI<sup>1</sup>,  
 YANHONG LI<sup>1</sup> and KEKE HUO<sup>1</sup>

<sup>1</sup>State Key Laboratory of Genetic Engineering, Institute of Genetics, School of Life Sciences, Fudan University, 220 Handan Rd., Shanghai 200433, China, <sup>2</sup>Howard Hughes Medical Institute, Department of Biological Chemistry, University of Michigan Medical School, Ann Arbor, MI 48109, USA (current address)

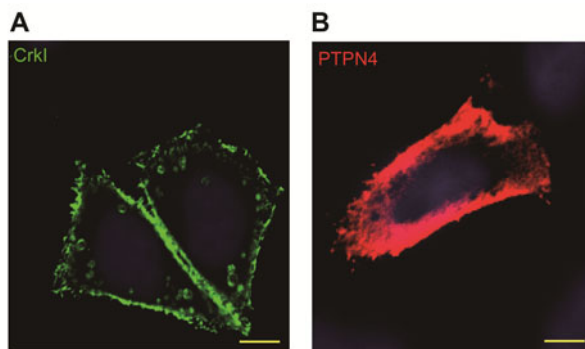

Suppl. Fig. 1. Localization of Crkl or PTPN4 in cells. A – Localization of Crkl in cells. Crkl-GFP plasmid was transfected in HeLa cells. B – Localization of PTPN4 in cells. PTPN4-Myc plasmid was transfected in HeLa cells. Immunofluorescence staining was performed using an anti-c-Myc antibody. These images were visualized using a confocal laser-scanning microscope. Bars = 5 µm.

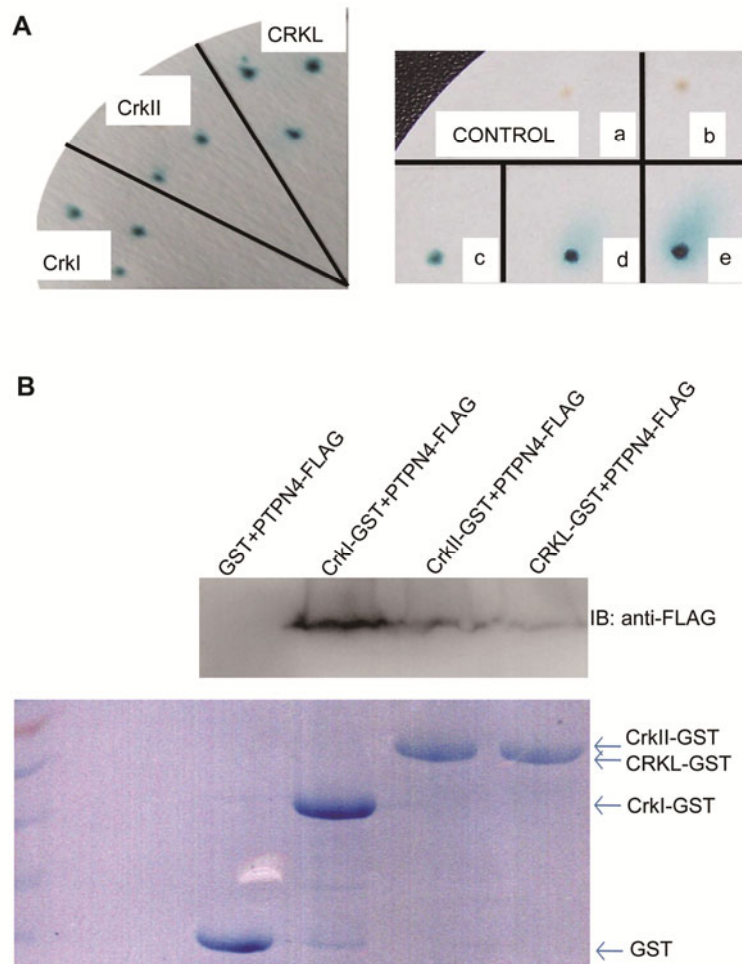

Suppl. Fig. 2. PTPN4 can interact with all three CRK family members. A – Yeast two-hybrid assay. Left panel: pDBLeu-PTPN4 was co-transformed with pPC86-CrkI, pPC86-CrkII, and pPC86-CRKL into yeast strain MaV203. The  $\beta$ -galactosidase assay showed that PTPN4 can interact with all three CRK family members. Blue color indicates positive interactions. Right panel: MaV203 yeast two-hybrid controls with different degrees of protein-protein interaction. In the controls from a to e, the interaction degree is from negative to maximal positive. B – GST pull-down assay. Recombinant GST, GST-CrkI, GST-CrkII and GST-CRKL proteins were purified from *E. coli*. PTPN4 protein was expressed and purified from HEK293T cells.
